# Supplementary material
Source: Springer Nature journal article supplement (https://www.springermedizin.de/resource/supplementary/12865_2005_79_MOESM2_ESM.pdf/9428466)

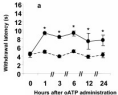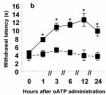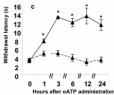

Supplement: MOESM2 [file 9428466]
